# Supplementary material for: Maternal SARS-CoV-2 impacts fetal placental macrophage programs and placenta-derived microglial models of neurodevelopment
Source: bioRxiv or medRxiv preprint supplement (doi:10.1101/2023.12.29.23300544), 2023-12-30
Supplement: Supplementary file [file media-1.pdf]

**SUPPLEMENTAL INFORMATION**

**Figure S1.**

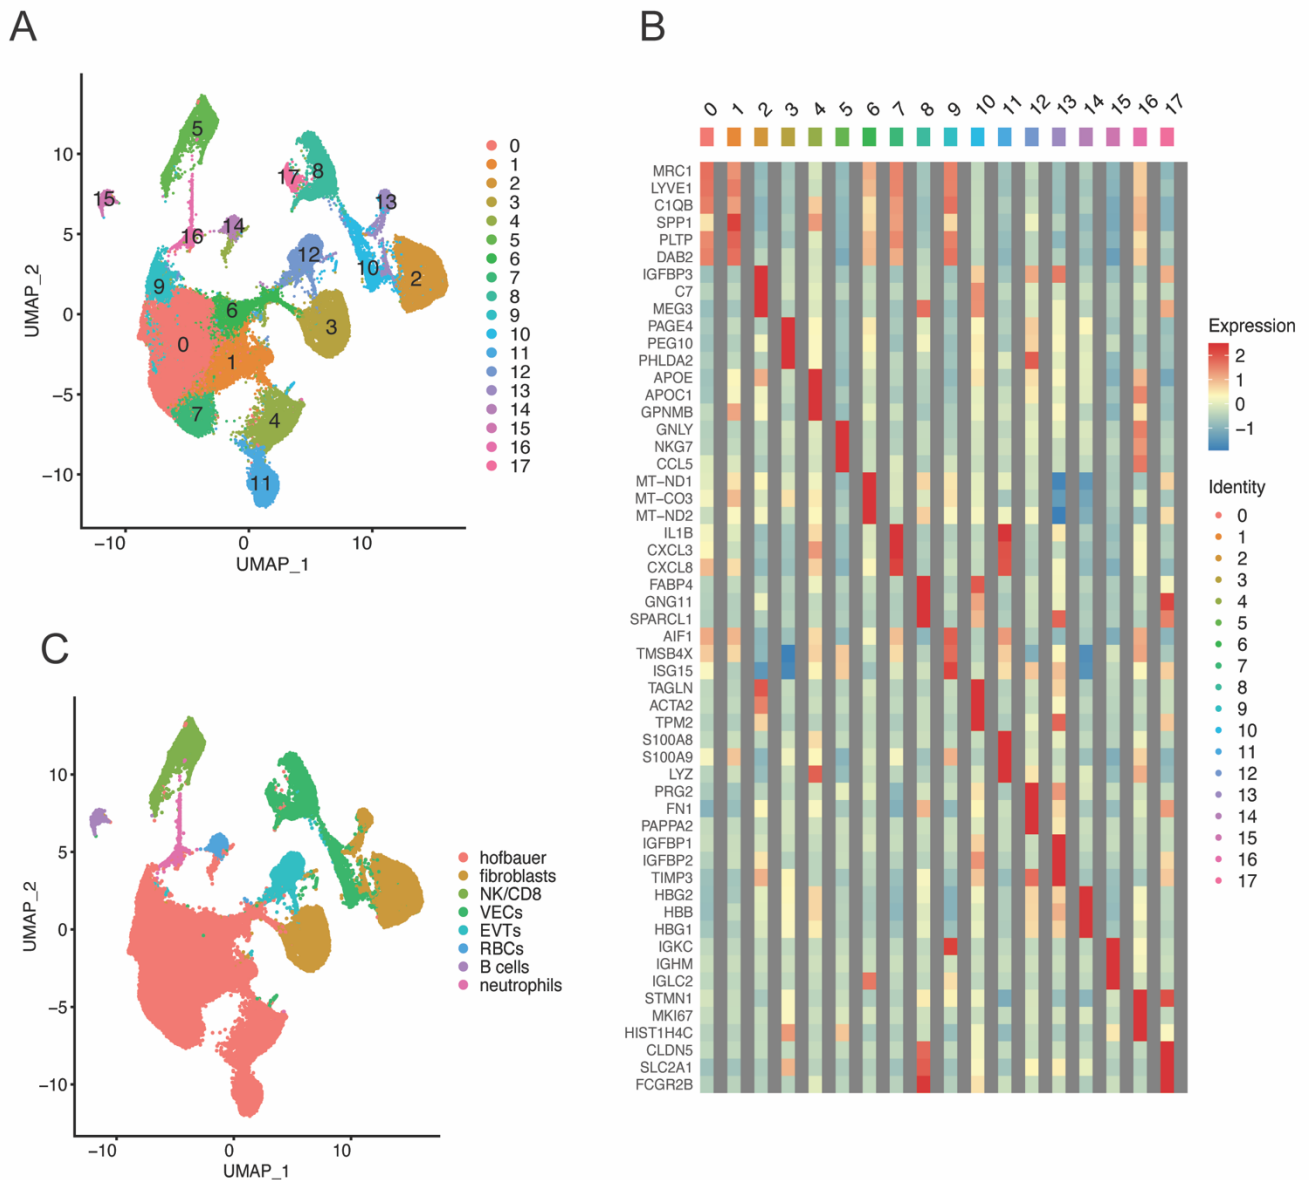

**Figure S1. Initial graph-based clustering and cluster assignments.** (A) Uniform Manifold Approximation and Projection (UMAP) visualization of 70,817 high-quality placental cells, enriched from placentas of pregnancies with (n=4) and without (n=8) SARS-CoV-2 infection, shows 18 clusters. (B) Heatmap displaying expression (log<sub>2</sub> fold change) of the top 3 marker genes per cluster. (C) UMAP visualization of cluster assignment by marker gene analysis demonstrating largest proportion of cells were macrophages/monocytes (labeled “hofbauer”) and subset for further quality control and reclustering. NK: natural killer cells. VECs: vascular endothelial cells. EVT: extravillous trophoblasts. RBCs: red blood cells.

**Figure S2.**

**A**

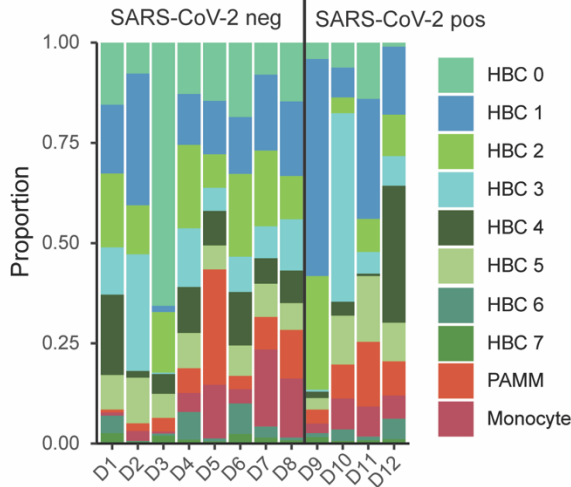

**B**

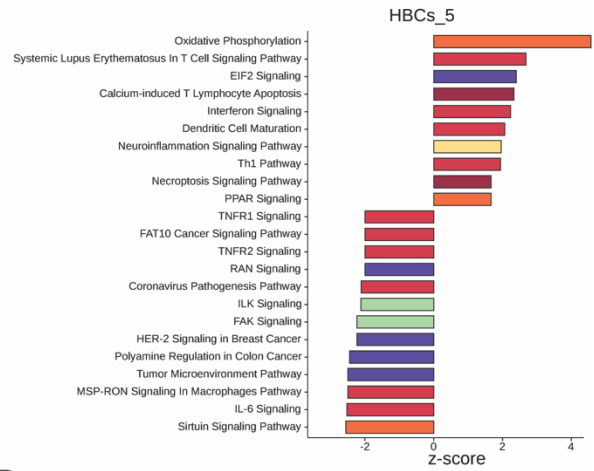

**C**

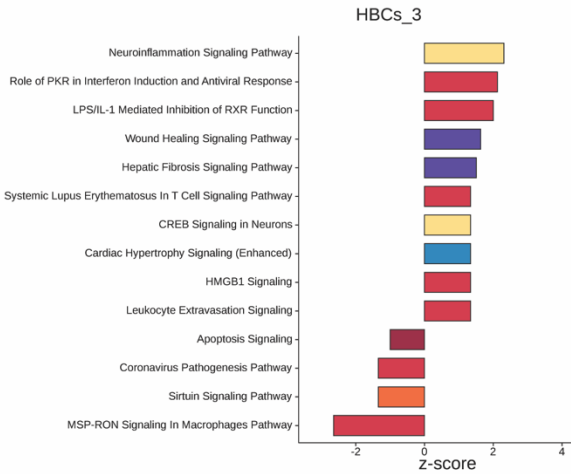

**D**

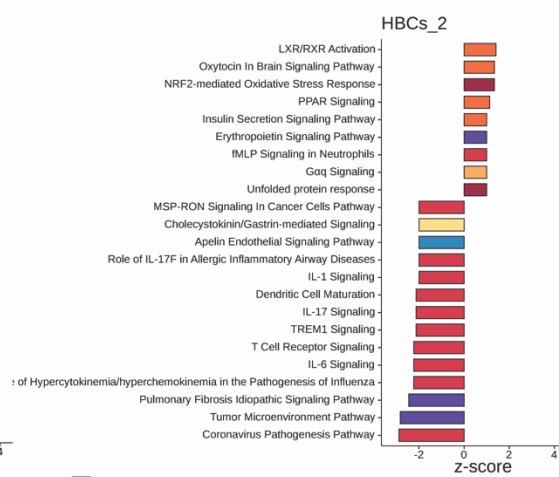

**E**

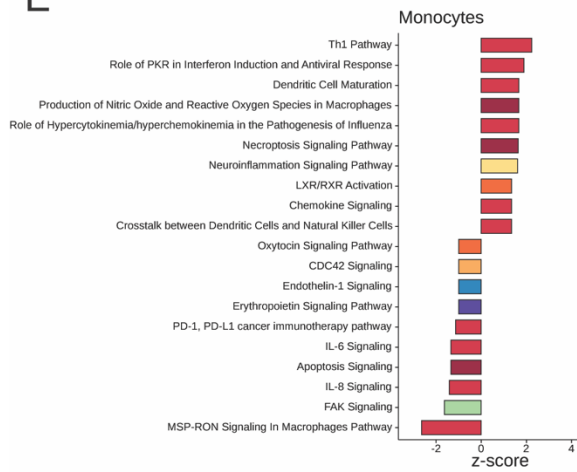

**F**

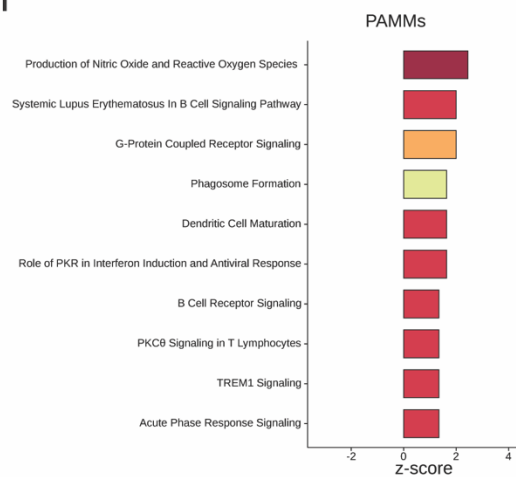

■ Apoptosis & stress response  
■ Immune & pro-inflammatory responses  
■ Endocrine & Metabolism  
■ intracellular signaling/Rho GTPase signaling  
■ Neurodevelopment/neuroinflammation/neurotransmitter  
■ Phagocytosis  
■ Cellular migration/chemotaxis  
■ Transcriptional regulation & protein synthesis  
■ Cardiovascular signaling, angiogenesis  
■ Cellular growth, proliferation, development

**Figure S2. Impact of maternal SARS-CoV-2 infection on Hofbauer cell subclusters, PAMMs and monocytes.** HBC: Hofbauer cell. PAMM: placenta-associated macrophage/monocyte. **(A)** Barplot demonstrating proportion of cells within each subcluster by participant. “SARS-CoV-2 neg” = no maternal SARS-CoV-2 infection during pregnancy. “SARS-CoV-2 pos” = positive maternal SARS-CoV-2 test during pregnancy. **(B-F)** Ingenuity Pathway Analysis (IPA) canonical pathways enrichment results of DEG by subcluster. IPA canonical pathways with absolute Z-score  $\geq 1$  and adjusted P-value  $< 0.05$  are displayed.

**Figure S3.**

**A**

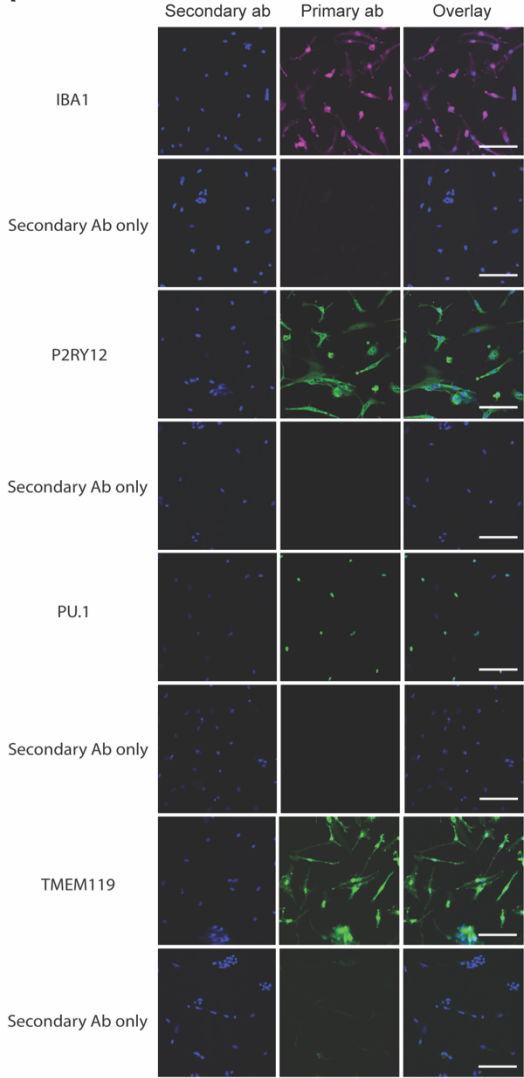

**B**

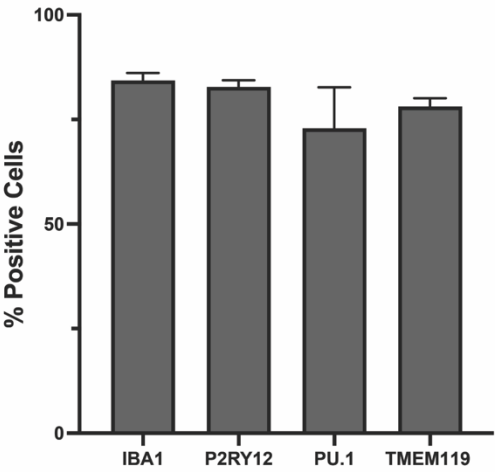

**C**

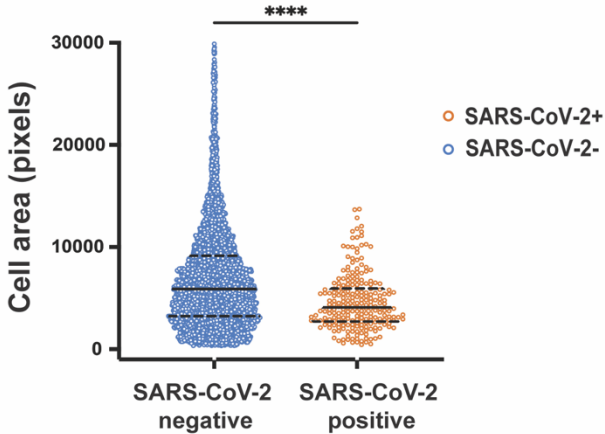

**D**

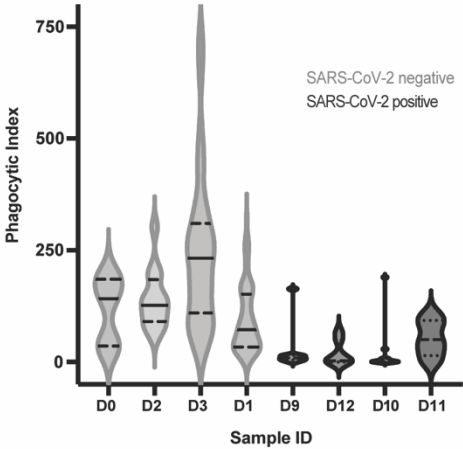

**E**

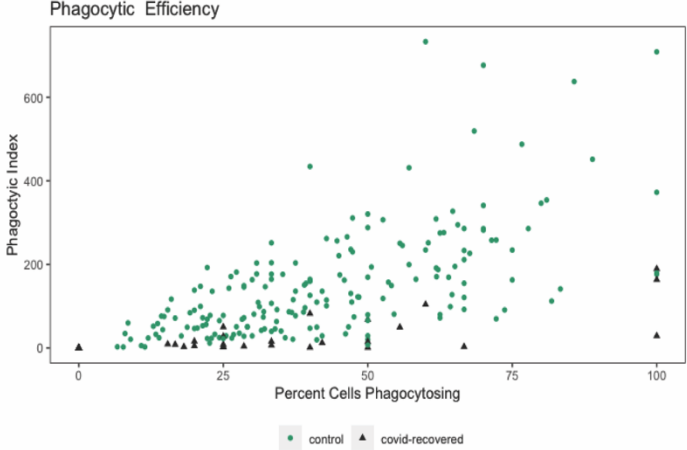

**Figure S3. HBC-iMG phenotypic and functional characterization.** HBC-iMGs: Hofbauer cells transdifferentiated toward microglia-like cells. Ab = antibody. **(A)** Confocal microscopy of immunostaining with primary antibody, secondary antibody (Hoechst nuclear stain) and overlay, showing lack of nonspecific staining. Scale bar = 100  $\mu\text{m}$ . **(B)** Percentage of cells per sample with positive immunostaining. **(C)** Violin plots representing cell area (pixels) from cells in SARS-CoV-2 negative controls (blue, n=5257 cells) and positive cases (orange, n=232 cells). Solid lines represent median values and dashed lines interquartile range. Group differences assessed by Mann-Whitney U Test. \*\*\*\*P<0.0001. **(D)** Violin plot of phagocytic index per participant. Solid lines represent median values and dashed lines interquartile range. **(E)** Phagocytic Index by percent of cells engaged in any phagocytosis, by SARS-CoV-2 status. Green circles: SARS-CoV-2 negative controls (n=187 fields). Black triangles: SARS-CoV-2 positive cases (n=32 fields).

**Figure S4.**

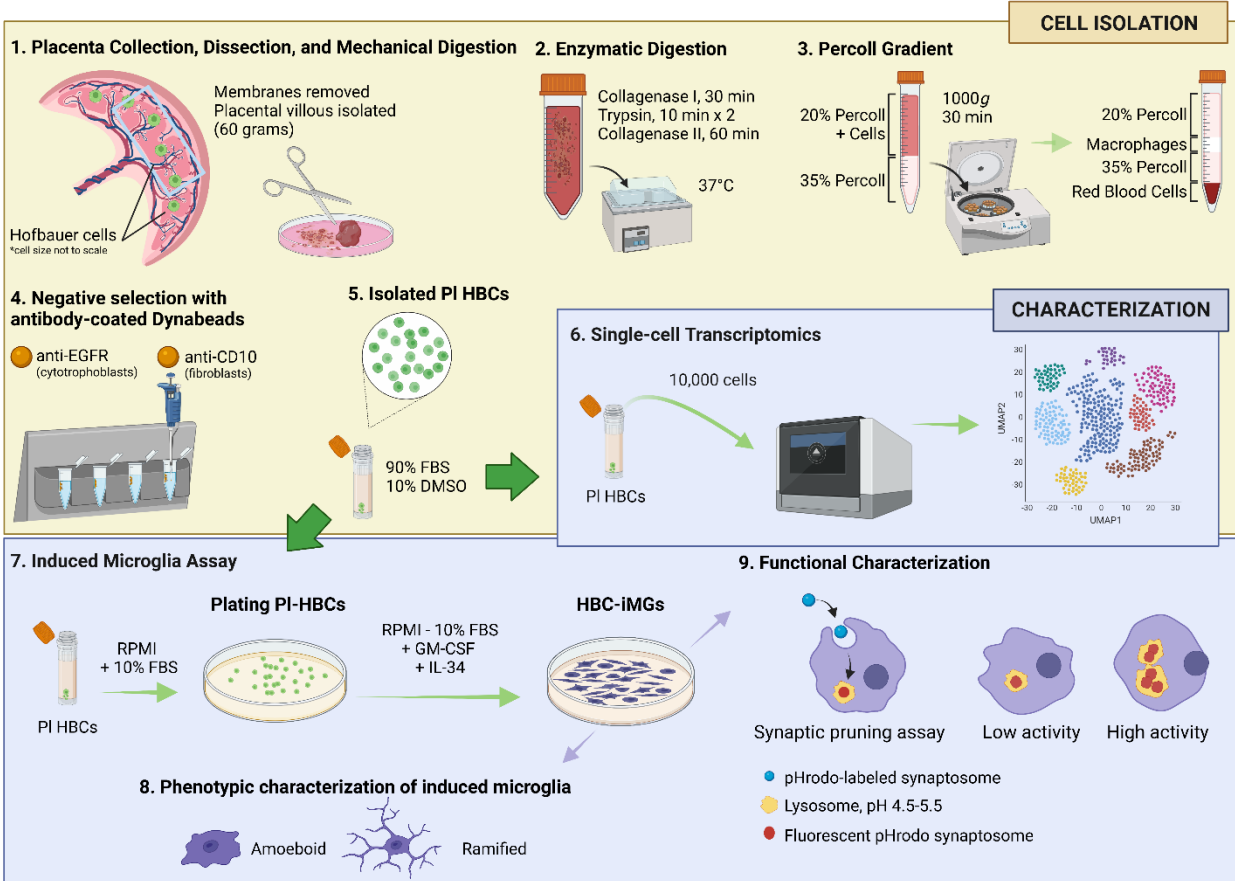

**Figure S4. Schematic of Hofbauer cell isolation procedure workflow and downstream analyses.** HBCs: Hofbauer cells. HBC-iMGs: Hofbauer cells transdifferentiated toward microglia-like cells. HBCs were isolated using collagenase and trypsin digestions, followed by centrifugation on Percoll gradients, and negative bead-based selection with antibody-coated anti-EGFR and anti-CD10 Dynabeads. HBCs were then characterized by single-cell RNA-Seq (10X Genomics) and cytokine induction to create HBC-iMGs. Image created in BioRender.

**Table S1. List of reagents used in Hofbauer cell isolation procedure.**

| <b>Reagents</b>                                                                                                                                                           | <b>Source</b>                                                                                                                                           | <b>Cat#</b>                                                                       |
|---------------------------------------------------------------------------------------------------------------------------------------------------------------------------|---------------------------------------------------------------------------------------------------------------------------------------------------------|-----------------------------------------------------------------------------------|
| <b>Cytowash</b><br>DMEM Medium<br>Fetal Bovine Serum<br>Pen/Strep (10,000 U/mL)<br>Gentamicin                                                                             | Thermo Fisher Scientific<br>Cytiva<br>Thermo Fisher Scientific<br>Thermo Fisher Scientific                                                              | 11965118<br>SH 30071.03<br>15140122<br>15750060                                   |
| <b>DPBS Wash</b><br>1X DPBS, Ca-/Mg-free<br>Pen/Strep (10,000 U/mL)                                                                                                       | Thermo Fisher Scientific<br>Thermo Fisher Scientific                                                                                                    | 14190144<br>15140122                                                              |
| <b>Collagenase Digestion 1</b><br>1X DPBS, Ca-/Mg-free<br>Collagenase Type IA<br>DNase I<br>Hyaluronidase<br>Bovine Serum Albumin<br>CaCl (3M stock, 1000x)               | Thermo Fisher Scientific<br>Millipore Sigma<br>Millipore Sigma<br>Millipore Sigma<br>Millipore Sigma<br>Boston Bio Products                             | 14190144<br>11088793001<br>DN25-1G<br>H3506-1G<br>A7906<br>MT-140-3M              |
| <b>Trypsin Digestion</b><br>1X DPBS, Ca-/Mg-free<br>Trypsin<br>DNase I<br>CaCl (3M stock, 1000x)                                                                          | Thermo Fisher Scientific<br>Thermo Fisher Scientific<br>Sigma Aldrich<br>Boston Bio Products                                                            | 14190144<br>Gibco 27250018<br>DN25-1G<br>MT-140-3M                                |
| <b>Collagenase Digestion 2</b><br>1X DPBS, Ca-/Mg-free<br>Collagenase Type IA<br>DNase I<br>Hyaluronidase<br>Bovine Serum Albumin<br>CaCl (3M stock, 1000x)<br>Dispase II | Thermo Fisher Scientific<br>Millipore Sigma<br>Millipore Sigma<br>Millipore Sigma<br>Millipore Sigma<br>Boston Bio Products<br>Thermo Fisher Scientific | 14190144<br>11088793001<br>DN25-1G<br>H3506-1G<br>A7906<br>MT-140-3M<br>171105041 |
| <b>Gradient Solutions</b><br>Percoll<br>Hanks' Balanced Salt Solution 10X<br>Hanks' Balanced Salt Solution 1X<br>OptiPrep Density Gradient Medium                         | GE Healthcare Biosciences<br>Thermo Fisher Scientific<br>Thermo Fisher Scientific<br>Millipore Sigma                                                    | 17-0891-01<br>14185052<br>14175095<br>D1556-250mL                                 |
| <b>Dynabeads</b><br>Goat anti-mouse IgG antibody<br>conjugated Dynabeads<br>Mouse anti-human EGFR<br>Mouse anti-human CD10 antibody                                       | Thermo Fisher Scientific<br>Thermo Fisher Scientific<br>Thermo Fisher Scientific                                                                        | 11033<br>MA5-16944<br>MA5-13070                                                   |
